# Supplementary material for: MAP3K3 expression in tumor cells and tumor-infiltrating lymphocytes is correlated with favorable patient survival in lung cancer
Source: PubMed Central journal article supplement (PMC4650617; doi:10.1038/srep11471), 2015-06-19
Supplement: srep11471-s1.pdf [file srep11471-s1.pdf]

**MAP3K3 expression in tumor cells and tumor-infiltrating lymphocytes is correlated with favorable patient survival in lung cancer**

Yanli He<sup>1</sup>, Lihui Wang<sup>2</sup>, Weijun Liu<sup>3</sup>, Jinjie Zhong<sup>4</sup>, Shengbin Bai<sup>4</sup>, Zhuwen Wang<sup>5</sup>, Dafydd G. Thomas<sup>6</sup>, Jules Lin<sup>5</sup>, Rishindra M. Reddy<sup>5</sup>, Nithya Ramnath<sup>7</sup>, Philip W. Carrott, Jr.<sup>5</sup>, William R. Lynch<sup>5</sup>, Mark B. Orringer<sup>5</sup>, Andrew C. Chang<sup>5</sup>, David G. Beer<sup>5</sup> & Guoan Chen<sup>5</sup>

<sup>1</sup>University of Guangzhou Chinese Medicine, Guangzhou, China, <sup>2</sup>Guangxi Medical University, Nanning, China, <sup>3</sup>The First People's Hospital of Yunnan Province, Kunming, China, <sup>4</sup>Xinjiang Medical University, Xinjiang, China, <sup>5</sup>Section of Thoracic Surgery, Department of Surgery, <sup>6</sup>Department of Pathology, <sup>7</sup>Division of Medical Oncology, Department of Internal Medicine, University of Michigan, Ann Arbor, Michigan, 48109, United States

Correspondence and requests for materials should be addressed to D.B. (dgbeer@med.umich.edu) or G. C. (guoanche@med.umich.edu)

**Supplementary Table S1-S5**

**Supplementary Figure S1-S7**

**Supplementary Table S1. MAP3K3 protein expression and clinical-pathological variables in lung adenocarcinomas (ADC)**

| Variables                         | Number | MAP3K3 Tumor |           | P value       |
|-----------------------------------|--------|--------------|-----------|---------------|
|                                   |        | Score 0+1    | Score 2+3 |               |
| <b>ADC</b>                        | 88     | 46(52.3)     | 42(47.7)  |               |
| <b>Age (years)</b>                |        |              |           |               |
| ≤65                               | 32     | 16(50.0)     | 16(50.0)  | 0.75          |
| >65                               | 56     | 30(53.6)     | 26(46.4)  |               |
| <b>Gender</b>                     |        |              |           |               |
| Female                            | 44     | 19(43.2)     | 25(56.8)  | 0.09          |
| Male                              | 44     | 27(61.4)     | 17(38.6)  |               |
| <b>Differentiation</b>            |        |              |           |               |
| Well                              | 26     | 9(34.6)      | 17(65.4)  | <b>0.02</b>   |
| Moderate                          | 33     | 18(54.5)     | 15(45.5)  |               |
| Poor                              | 29     | 19(65.5)     | 10(34.5)  |               |
| <b>Tumor size (T)</b>             |        |              |           |               |
| T1                                | 39     | 18(46.2)     | 21(53.8)  | 0.31          |
| T2+T3+T4                          | 49     | 29(59.2)     | 20(40.8)  |               |
| <b>Lymph Node metastasis (N)</b>  |        |              |           |               |
| No                                | 63     | 32 (50.8)    | 31(49.2)  | 0.36          |
| Yes                               | 25     | 15(60)       | 10(40)    |               |
| <b>Stage</b>                      |        |              |           |               |
| I                                 | 54     | 28(51.9)     | 26(48.1)  | 0.97          |
| II                                | 13     | 8(61.5)      | 5(38.5)   |               |
| III                               | 21     | 11(52.4)     | 10(47.6)  |               |
| <b>MAP3K3 Lymphocyte staining</b> |        |              |           |               |
| No lymphocytes                    | 45     | 31(68.9)     | 14(31.1)  | <b>0.0006</b> |
| positive                          | 43     | 16(37.2)     | 27(62.8)  |               |

**Supplementary Table S2. Cox model results for MAP3K3 mRNA in ADC**

|                           | Univariate Cox model |         | Multivariate Cox model* |         |
|---------------------------|----------------------|---------|-------------------------|---------|
|                           | HR                   | p value | HR                      | p value |
| Shedden data <sup>1</sup> | 0.47 (0.19-0.75)     | 0.001   | 0.58 (0.35-0.94)        | 0.03    |
| Okayama data <sup>2</sup> | 0.30 (0.14-0.67)     | 0.002   | 0.20 (0.07-0.58)        | 0.003   |
| qRT-PCR data              | 0.55 (0.31-0.97)     | 0.025   | 0.47 (0.25-0.89)        | 0.02    |

\* age, gender, stage and differentiation were adjusted (Okayama data doesn't have differentiation information, so age, gender and stage were adjusted in this data set).

**Supplementary Table S3. MAP3K3 fusion genes**

| 5' gene | 3' gene | Tissue        | Reference                 |
|---------|---------|---------------|---------------------------|
| MRC2    | MAP3K3  | Lung cancer   | Dhanasekaran <sup>3</sup> |
| BCAS3   | MAP3K3  | Lung cancer   | Seo <sup>4</sup>          |
| MAO15B  | MAP3K3  | Breast cancer | Dan <sup>5</sup>          |
| MAO15B  | MAP3K3  | Breast cancer | Fan <sup>6</sup>          |
| MAP3K3  | DDX42   | Schizophrenia | Rippey <sup>7</sup>       |
| TNS3    | MAP3K3  | mesothelioma  | Panagopoulos <sup>8</sup> |

**Supplementary Table S4. Clinical characteristics of samples used in this study.**

| Data set            | Shedden <sup>1</sup> | Okayama <sup>2</sup> | Hou <sup>9</sup>          | Validation set |
|---------------------|----------------------|----------------------|---------------------------|----------------|
| Platform            | U133A                | U133 plus2.0         | U133 plus2.0              | qRT-PCR        |
| Sample number       | 442                  | 246                  | 156                       | 101            |
| Type of cancer      | ADC                  | 226<br>ADC,20N       | 65N,45ADC,27SCC,19LL<br>C | ADC            |
| Age average (SD)    | 64.4 (10.1)          | 64.8 (9.6)           | 62.9 (10.8)               | 67.0 (9.6)     |
| Gender              |                      |                      |                           |                |
| Female              | 218 (49.7%)          | 48 (43.2%)           | 48(30.8%)                 | 53(52.5%)      |
| Male                | 221                  | 63                   | 108                       | 48             |
| Stage               |                      |                      |                           |                |
| Stage I             | 276(62.9%)           | 67(63.2%)            | NA                        | 59(58.4%)      |
| Stage II            | 104                  | 18                   | NA                        | 16             |
| Stage III           | 59                   | 21                   | NA                        | 26             |
| Differentiation     |                      |                      |                           |                |
| Well                | 60                   | NA                   | NA                        | 28             |
| Moderate            | 208                  | NA                   | NA                        | 38             |
| Poor                | 166(38.3%)           | NA                   | NA                        | 34(33.7%)      |
| Dead (5 year)       | 186(42.4%)           | 58(52.3%)            | NA                        | 44(43.6%)      |
| Alive               | 253                  | 53                   | NA                        | 57             |
| Median survival (m) | 47                   | 31.1                 | NA                        | 28.8           |

Abbreviation: ADC, adenocarcinoma; SCC, squamous cell cancer; LCC, large cell cancer; N, normal lung tissue.

Supplementary Table 5. Two lung tissues RNA-seq data sets

|        | Seo <sup>4</sup> | TCGA <sup>10</sup> |
|--------|------------------|--------------------|
| Normal | 77               | 73                 |
| ADC    | 85               | 309                |
| SCC    | 0                | 212                |

## References

1. Shedden, K., *et al.* Gene expression-based survival prediction in lung adenocarcinoma: a multi-site, blinded validation study. *Nat Med* 14, 822-827 (2008).
2. Okayama, H., *et al.* Identification of genes upregulated in ALK-positive and EGFR/KRAS/ALK-negative lung adenocarcinomas. *Cancer Res* 72, 100-111 (2012).
3. Dhanasekaran, S.M., *et al.* Transcriptome meta-analysis of lung cancer reveals recurrent aberrations in NRG1 and Hippo pathway genes. *Nat Commun* 5, 5893,doi: 10.1038 (2014).
4. Seo, J.S., *et al.* The transcriptional landscape and mutational profile of lung adenocarcinoma. *Genome Res* 22, 2109-2119 (2012).
5. Robinson, D.R., *et al.* Functionally recurrent rearrangements of the MAST kinase and Notch gene families in breast cancer. *Nat Med* 17, 1646-1651 (2011).
6. Fan, Y., *et al.* Amplification and over-expression of MAP3K3 gene in human breast cancer promotes formation and survival of breast cancer cells. *J Pathol* 232, 75-86 (2014).
7. Rippey, C., *et al.* Formation of chimeric genes by copy-number variation as a mutational mechanism in schizophrenia. *Am J Hum Genet* 93, 697-710 (2013).
8. Panagopoulos, I., Gorunova, L., Davidson, B. & Heim, S. Novel TNS3-MAP3K3 and ZFPM2-ELF5 fusion genes identified by RNA sequencing in multicystic mesothelioma with t(7;17)(p12;q23) and t(8;11)(q23;p13). *Cancer Lett* 357,502-509(2015).
9. Hou, J., *et al.* Gene expression-based classification of non-small cell lung carcinomas and survival prediction. *PLoS One* 5, e10312, doi: 10.1371 (2010).
10. Comprehensive molecular profiling of lung adenocarcinoma. *Nature* 511, 543-550 (2014).

## Supplementary Figure S1

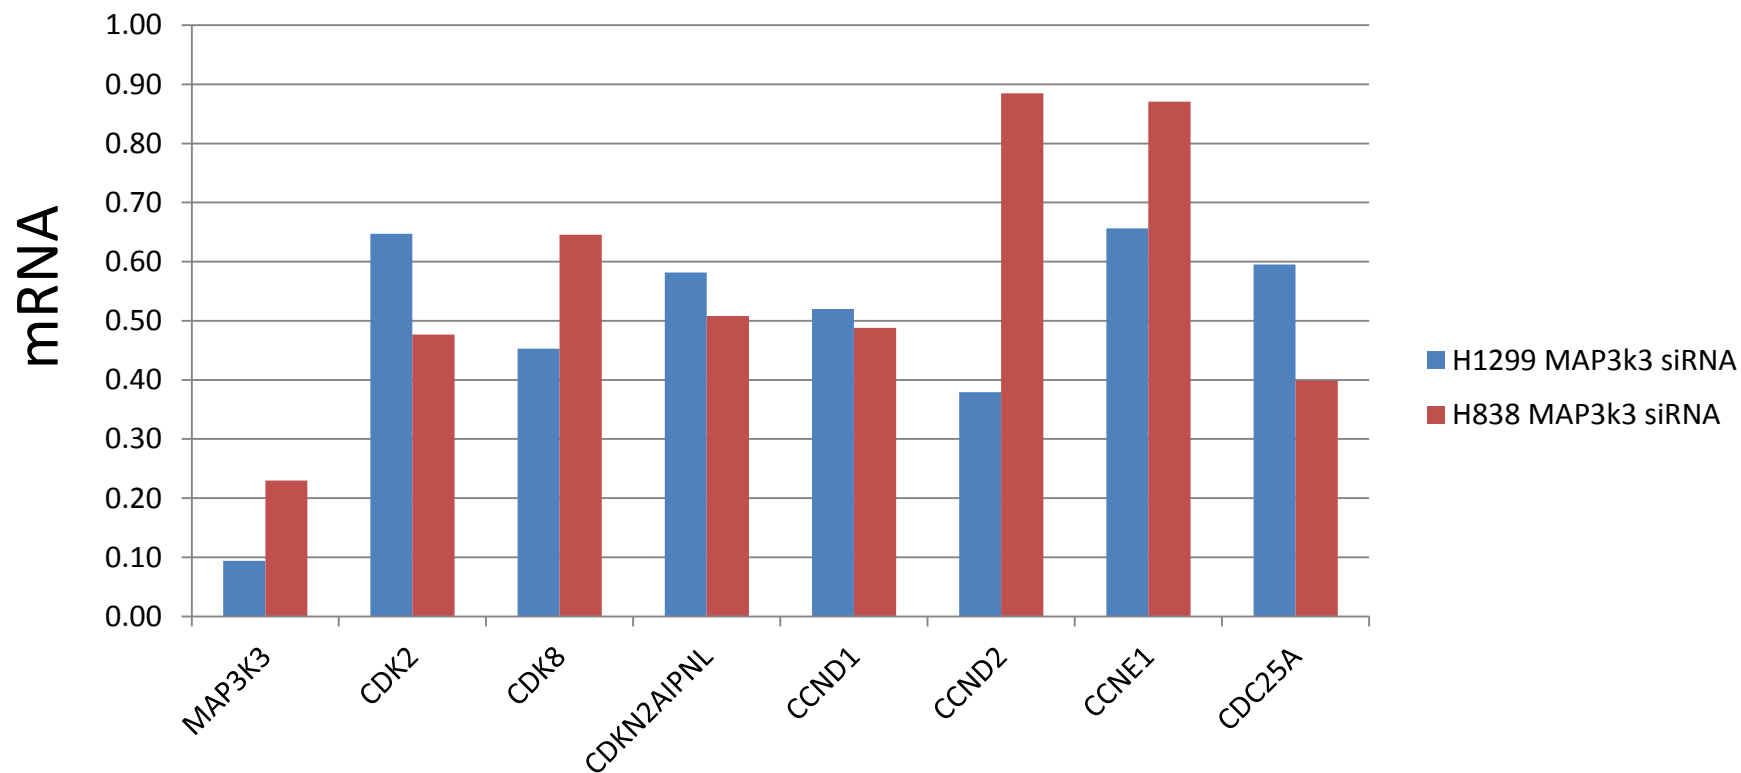

**Supplementary Figure S1.** Cell Cycle related genes are decreased after MAP3K3 siRNA knockdown using Affymetrix Exon ST2.1 array. Further validation by Western blot is warrant.

## Supplementary Figure S2

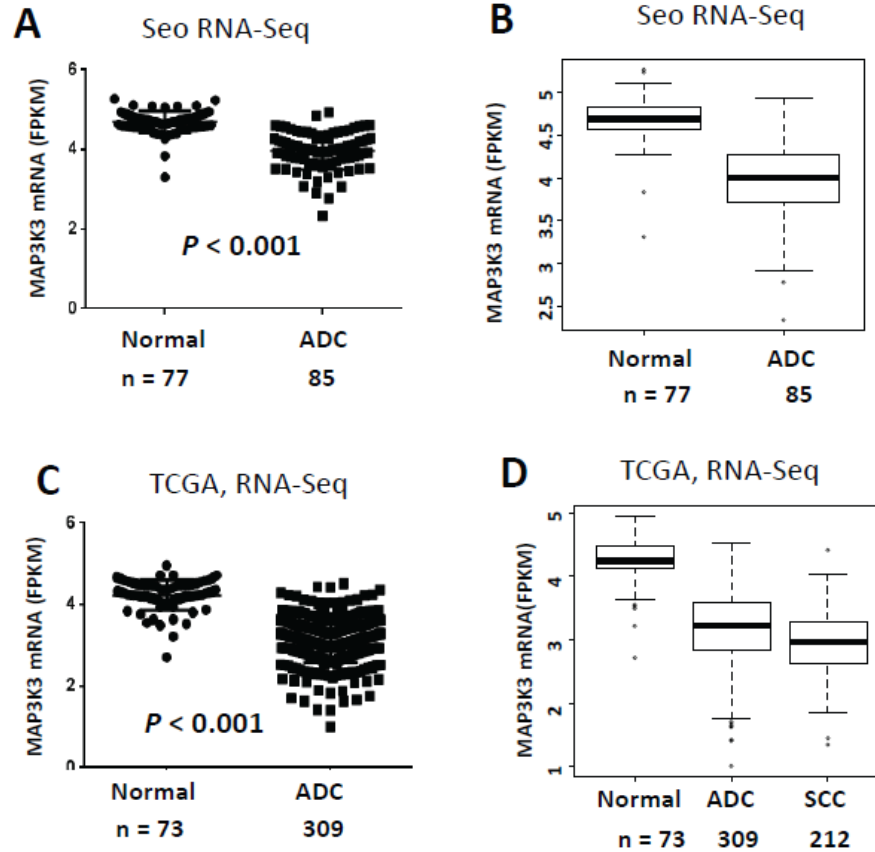

**Supplementary Figure S2.** *MAP3K3* mRNA was higher in normal lung tissues compared to lung cancer in two RNA-Seq data sets.

## Supplementary Figure S3

**Supplementary Figure S3.** From Oncomine data base: *MAP3K3* mRNAs were decreased in many kinds of cancers (vs. normal) including bladder, breast, esophagus, Head & Neck, liver, lung and prostate cancers. Whereas, colorectal cancer, leukemia, lymphoma, myeloma and ovarian cancer were not consistent from different studies. Red= higher in tumor (vs. Normal), Blue= lower in tumor. Number indicated number of data set or comparison between tumor vs. normal.

## Oncomine Disease Summary for MAP3K3

| Analysis Type by Cancer     | Cancer vs. Normal |    | Cancer vs. Cancer |    |              |    |
|-----------------------------|-------------------|----|-------------------|----|--------------|----|
|                             |                   |    | Cancer Histology  |    | Multi-cancer |    |
| Bladder Cancer              |                   | 2  |                   |    |              |    |
| Brain and CNS Cancer        |                   |    |                   |    | 1            | 1  |
| Breast Cancer               |                   | 13 | 1                 | 3  |              |    |
| Cervical Cancer             |                   |    |                   |    |              |    |
| Colorectal Cancer           | 4                 | 4  |                   |    |              | 4  |
| Esophageal Cancer           |                   | 3  |                   |    |              | 2  |
| Gastric Cancer              |                   |    | 1                 | 1  |              |    |
| Head and Neck Cancer        |                   | 3  | 1                 |    |              |    |
| Kidney Cancer               | 1                 |    | 1                 | 1  | 1            |    |
| Leukemia                    | 3                 | 7  | 8                 | 9  | 4            | 1  |
| Liver Cancer                |                   | 2  |                   |    |              |    |
| Lung Cancer                 |                   | 9  | 1                 | 1  |              | 2  |
| Lymphoma                    | 6                 | 8  | 1                 | 1  | 5            |    |
| Melanoma                    |                   |    |                   |    | 4            |    |
| Myeloma                     | 1                 | 1  |                   |    |              |    |
| Other Cancer                |                   | 2  | 1                 |    | 1            |    |
| Ovarian Cancer              | 1                 | 1  |                   |    |              |    |
| Pancreatic Cancer           | 1                 |    |                   |    |              |    |
| Prostate Cancer             |                   | 1  |                   |    | 1            |    |
| Sarcoma                     | 1                 |    | 3                 | 8  | 4            |    |
| Significant Unique Analyses | 18                | 56 | 16                | 22 | 19           | 10 |
| Total Unique Analyses       | 332               |    | 578               |    | 185          |    |

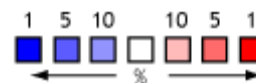



## Supplementary Figure S4

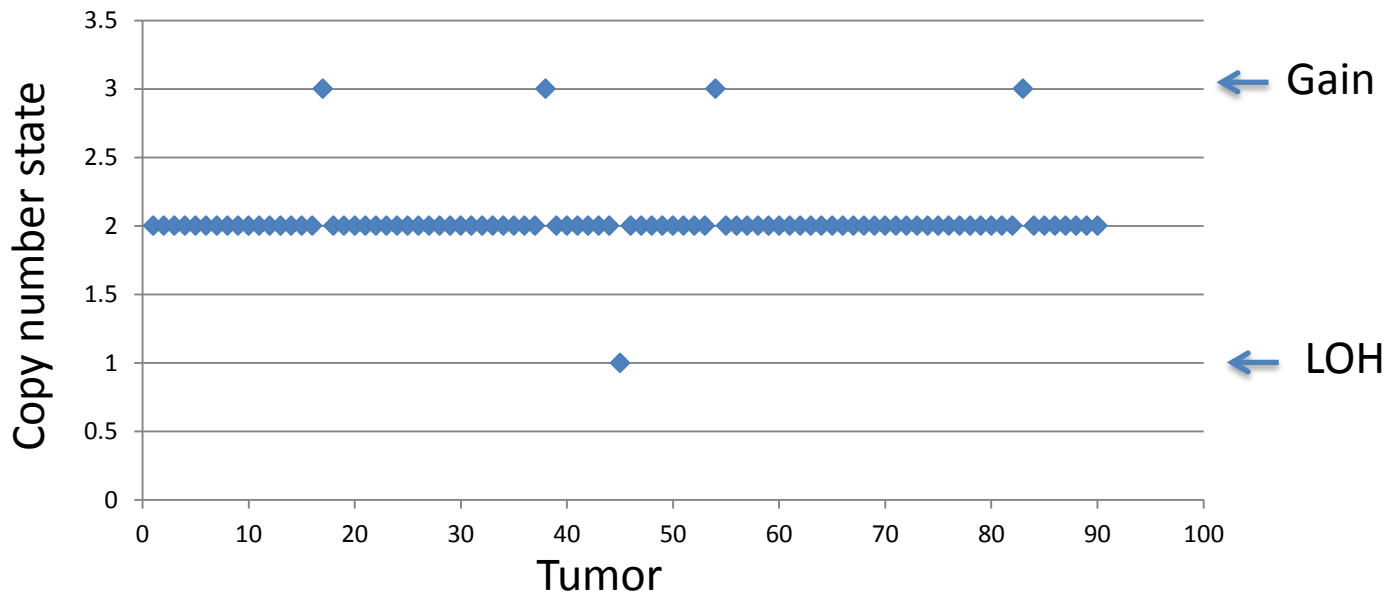

**Supplementary Figure S4.** MAP3k3 (located at chr17:61609801-61773670) DNA copy number change in 90 lung adenocarcinomas using SNP6.0, analyzed using Affymetrix Genotyping Console (GTC 4.1). 4 single copy gain and 1 heterozygous deletion were found.

- State 0 = CN of 0; homozygous deletion
- State 1 = CN of 1; heterozygous deletion
- State 2 = CN of 2; normal diploid
- State 3 = CN of 3; single copy gain
- State 4 = CN 4; amplification

## Supplementary Figure S5

| Sample ID | AA Mutation | CDS Mutation | Pubmed Id |
|-----------|-------------|--------------|-----------|
| 1423679   | p.R597W     | c.1789C>T    | 18948947  |
| 1423766   | p.A510fs*25 | c.1528delG   | 18948947  |
| 1423831   | p.R434L     | c.1301G>T    | 18948947  |
| 1863687   | p.R299Q     | c.896G>A     | 22975805  |
| 1863732   | p.G272D     | c.815G>A     | 22975805  |
| 2015226   | p.P216S     | c.646C>T     | 23733853  |
| 1780065   | p.R363L     | c.1088G>T    | -         |
| 1780081   | p.P160P     | c.480C>T     | -         |
| 2024537   | p.R597L     | c.1790G>T    | 23799614  |
| 1782659   | p.R363L     | c.1088G>T    | -         |
| 1759434   | p.?         | c.779-2A>T   | 22941189  |
| 1870263   | p.R608H     | c.1823G>A    | 23033341  |
| 1759264   | p.?         | c.779-2A>T   | 22941188  |
| 1765262   | p.A338P     | c.1012G>C    | 22980975  |
| 1914116   | p.L94V      | c.280C>G     | -         |
| 1914083   | p.T462K     | c.1385C>A    | -         |

**Supplementary Figure S5.** MAP3K3 gene mutations were detected in 16 out of 1218 (1.3%) lung cancers. <http://cancer.sanger.ac.uk/cosmic>

## Supplementary Figure S6

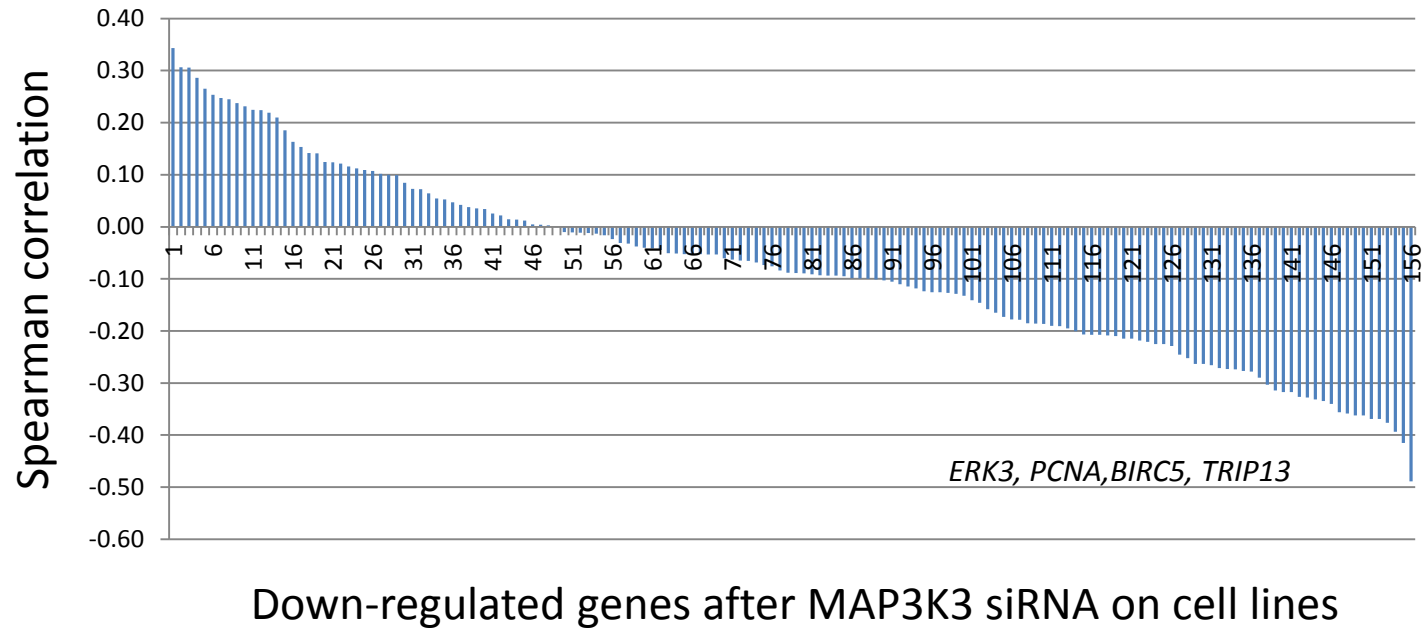

**Supplementary Figure S6.** Most (107/156) down regulated genes (0.6 fold after MAP3K3 siRNA treatment) on H1299 and H838 cell lines (*in vitro*) are lost or became negatively correlated to MAP3K3 on 442 ADC (*in vivo*) may be due to the tumor environment changes such as *ERK3*, *PCNA*, *BIRC5* and *TRIP13*, etc.

# Supplementary Figure S7

H1299

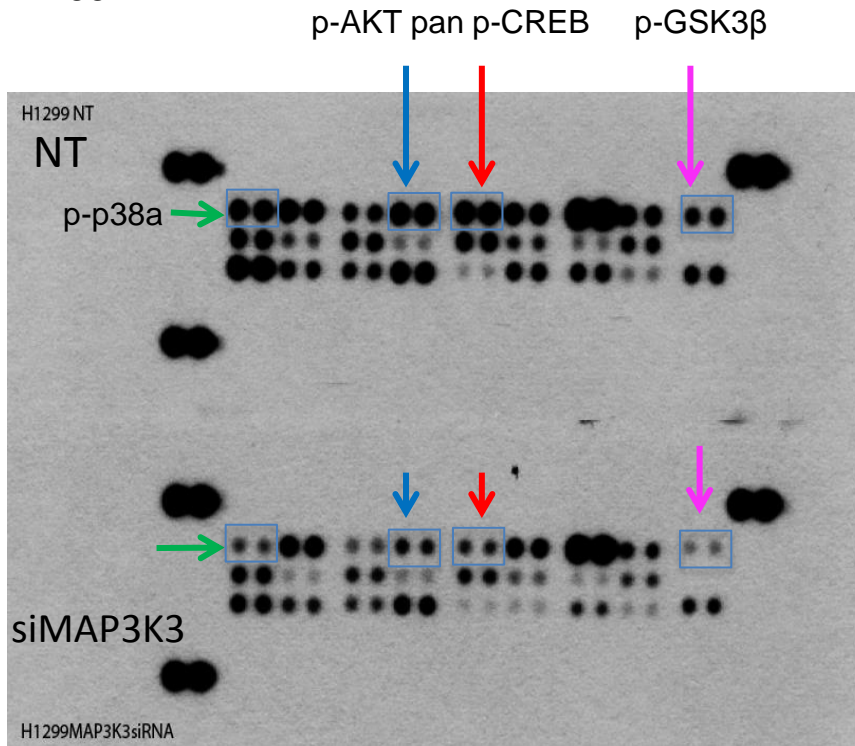

H838

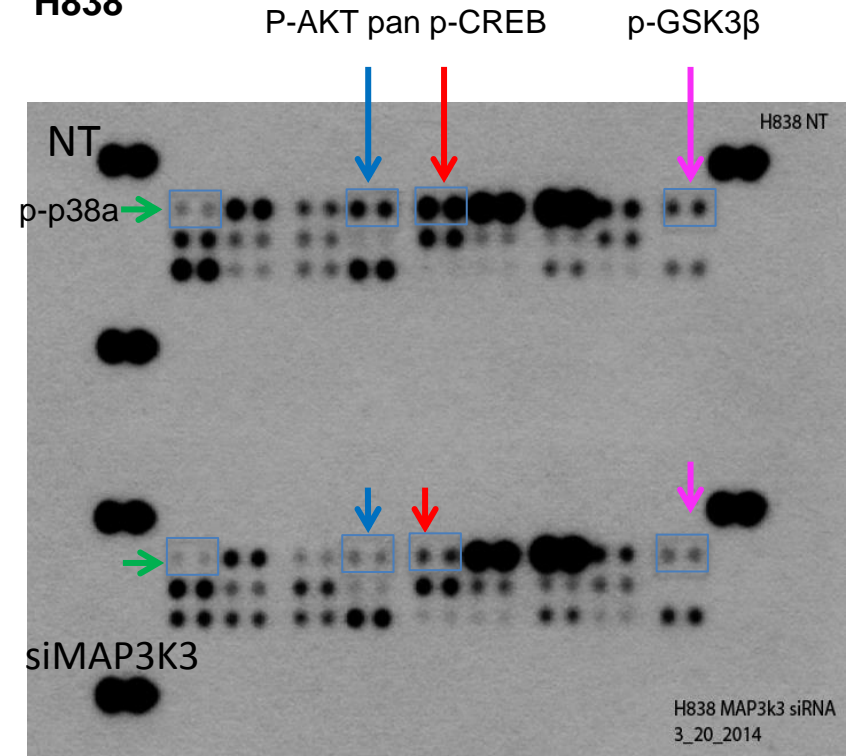

**Supplementary Figure S7.** Original image for main Figure 2A.

Four phospho-proteins (p-AKTpan, p-GSK3β, p-P38α and p-CREB) were down-regulated after MAP3K3 siRNA knockdown (siMAP3K3) at 72 h in both the H1299 and H838 cell lines as compared to non-target siRNA control (NT) as determined using the Human MAPK antibody array
